# Supplementary material for: RhoG-Binding Domain of Elmo1 Ameliorates Excessive Process Elongation Induced by Autism Spectrum Disorder-Associated Sema5A
Source: Pathophysiology. 2023 Nov 27;30(4):548–66. doi: 10.3390/pathophysiology30040040 (PMC10745971; doi:10.3390/pathophysiology30040040)
Supplement: Supplementary file 1 [file pathophysiology-30-00040-s001.zip]

Archive with 12 entries (12 files):
- 02.2. SEMA5A supple. leg.pdf
- Figure S1.tif
- Figure S10 Supplemental file for Figure S3.tif
- Figure S11 Supplemental file for Figure S4.tif
- Figure S2.tif
- Figure S3.tif
- Figure S4.tif
- Figure S5 Supplemental file for Figure 1.tif
- Figure S6 Supplemental file for Figure 5.tif
- Figure S7 Supplemental file for Figure 6.tif
- Figure S8 Supplemental file for Figure 8.tif
- Figure S9 Supplemental file for Figure 9.tif
